# Supplementary material for: Stimulant Therapy and Risk for Subsequent Substance Use Disorders in Male Adults With ADHD: A Naturalistic Controlled 10-Year Follow-Up Study
Source: Atypon-hosted journal article supplement (doi:10.1176/appi.ajp.2007.07091486), 2008-03-03
Supplement: ajp_165_5_597_01.pdf [file ajp_165_5_597_01.pdf]

**Table 1**

**Univariate Cox Survival Models of the Association Between Substance Use Outcomes and Stimulant Therapy and Conduct Disorder in Adult Males With ADHD**

| Substance Use Outcome | Univariate Cox Survival Models |         |      |                         |         |        |
|-----------------------|--------------------------------|---------|------|-------------------------|---------|--------|
|                       | Stimulant Therapy Effect       |         |      | Conduct Disorder Effect |         |        |
|                       | Hazard Ratio                   | 95% CI  | p    | Hazard Ratio            | 95% CI  | p      |
| Alcohol abuse         | 0.9                            | 0.5–1.6 | 0.74 | 1.7                     | 1.0–2.8 | 0.06   |
| Alcohol dependence    | 0.8                            | 0.4–1.7 | 0.56 | 2.0                     | 1.0–4.2 | 0.06   |
| Drug Abuse            | 1.2                            | 0.6–2.3 | 0.67 | 1.8                     | 1.0–3.3 | 0.07   |
| Drug dependence       | 0.7                            | 0.3–1.7 | 0.48 | 2.6                     | 1.1–5.9 | 0.03   |
| Nicotine dependence   | 0.8                            | 0.4–1.4 | 0.41 | 2.6                     | 1.5–4.5 | p<0.01 |
